# Supplementary material
Source: PubMed Central journal article supplement (PMC5006207)

Supplementary Fig. 1S

Full -length blots for Fig. 1C

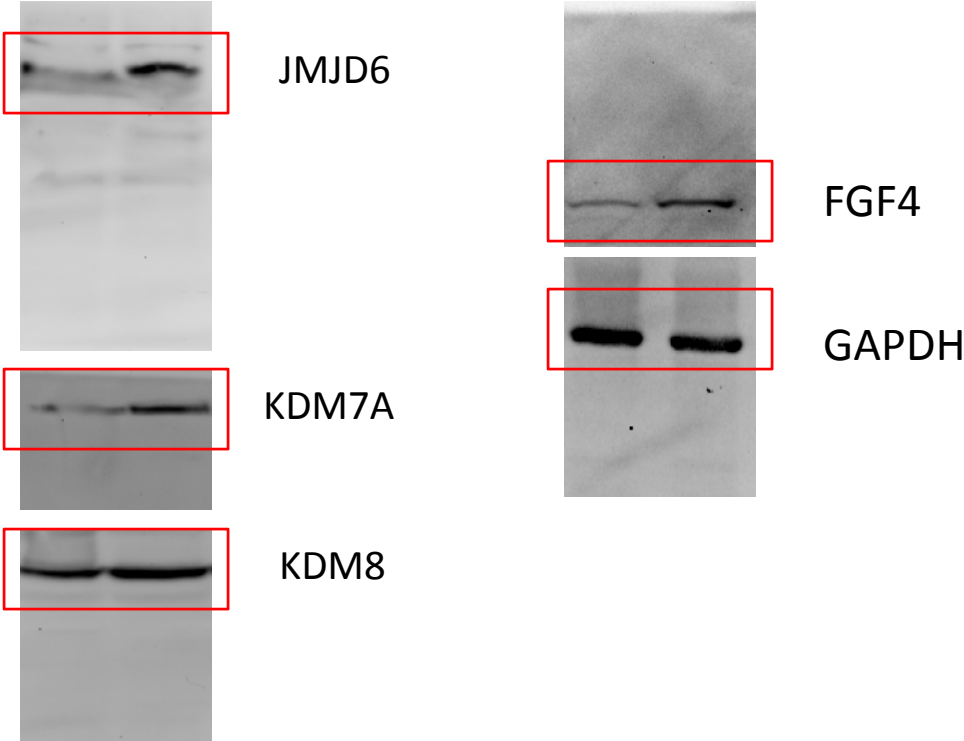

Supplementary Fig. 2S

Full -length blots for Fig. 2C

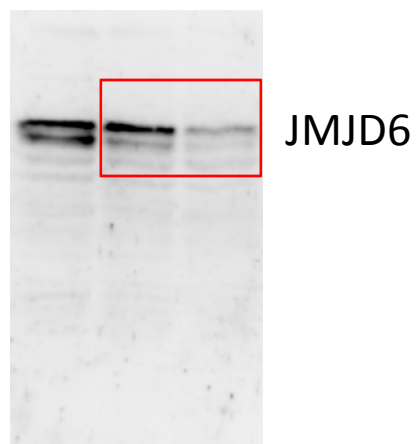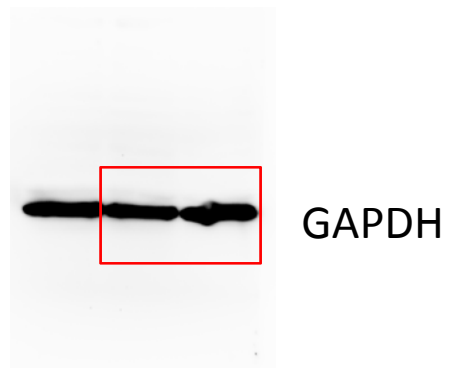

Supplementary Fig. 3S

Full -length blots for Fig. 3A

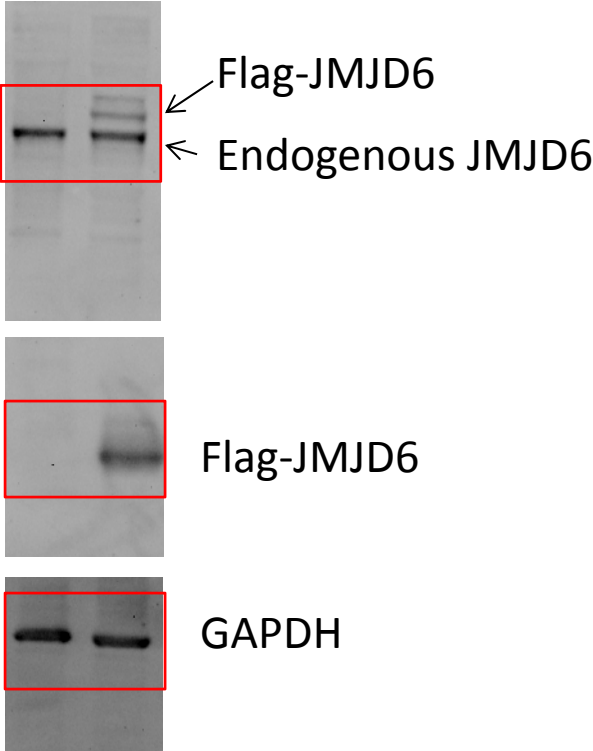

Supplementary Fig. 4S

Full -length blots for Fig. 6A

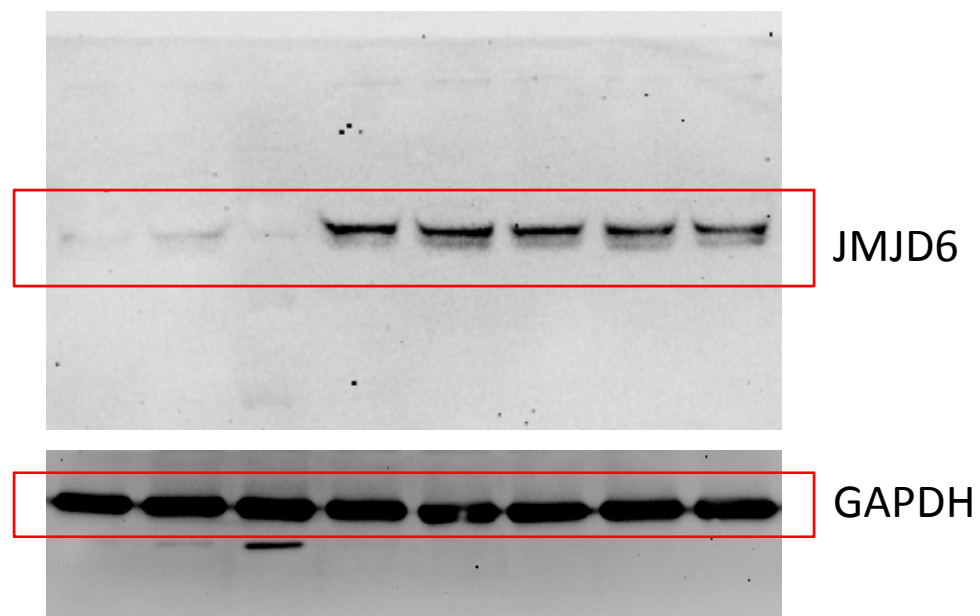

Supplement: supp_bgv169_Supplementary_Figures___Lee_et_al_.pdf [file supp_bgv169_Supplementary_Figures___Lee_et_al_.pdf]
